# Supplementary material for: Availability of Integrated Primary Care Services in Community Mental Health Care Settings
Source: Atypon-hosted journal article supplement (doi:10.1176/appi.ps.201800448), 2019-03-07
Supplement: appi.ps.201800448.ds001.pdf [file appi.ps.201800448.ds001.pdf]

## Online appendix: Availability of integrated primary care services by state and region

| State Rank | CMHCs |                                               |                                           |                  | Outpatient Mental Health Facilities |                                               |                                           |                  |
|------------|-------|-----------------------------------------------|-------------------------------------------|------------------|-------------------------------------|-----------------------------------------------|-------------------------------------------|------------------|
|            | State | Proportion that Offer Integrated Primary Care | Number that Offer Integrated Primary Care | Total Facilities | State                               | Proportion that Offer Integrated Primary Care | Number that Offer Integrated Primary Care | Total Facilities |
|            | All   | 23%                                           | 588                                       | 2546             | All                                 | 19%                                           | 838                                       | 4471             |
| 1          | DC    | 56%                                           | 5                                         | 9                | ND                                  | 71%                                           | 5                                         | 7                |
| 2          | OK    | 51%                                           | 30                                        | 59               | MO                                  | 46%                                           | 26                                        | 57               |
| 3          | CT    | 50%                                           | 9                                         | 18               | HI                                  | 44%                                           | 8                                         | 18               |
| 4          | TX    | 49%                                           | 52                                        | 106              | SD                                  | 40%                                           | 4                                         | 10               |
| 5          | AZ    | 42%                                           | 14                                        | 33               | DE                                  | 38%                                           | 3                                         | 8                |
| 6          | CO    | 41%                                           | 35                                        | 86               | VT                                  | 36%                                           | 4                                         | 11               |
| 7          | MI    | 39%                                           | 38                                        | 97               | NE                                  | 36%                                           | 25                                        | 69               |
| 8          | NH    | 36%                                           | 8                                         | 22               | AZ                                  | 34%                                           | 63                                        | 183              |
| 9          | UT    | 35%                                           | 7                                         | 20               | CO                                  | 31%                                           | 9                                         | 29               |
| 10         | IN    | 31%                                           | 40                                        | 128              | DC                                  | 30%                                           | 7                                         | 23               |
| 11         | LA    | 31%                                           | 4                                         | 13               | OK                                  | 30%                                           | 10                                        | 33               |
| 12         | MO    | 30%                                           | 18                                        | 60               | RI                                  | 30%                                           | 3                                         | 10               |
| 13         | NV    | 30%                                           | 3                                         | 10               | TN                                  | 28%                                           | 27                                        | 96               |
| 14         | OR    | 30%                                           | 9                                         | 30               | CT                                  | 28%                                           | 31                                        | 111              |
| 15         | VT    | 30%                                           | 6                                         | 20               | AK                                  | 25%                                           | 7                                         | 28               |
| 16         | OH    | 29%                                           | 42                                        | 144              | IN                                  | 25%                                           | 10                                        | 40               |
| 17         | RI    | 26%                                           | 5                                         | 19               | NH                                  | 25%                                           | 1                                         | 4                |
| 18         | SD    | 26%                                           | 6                                         | 23               | NM                                  | 25%                                           | 3                                         | 12               |
| 19         | IL    | 26%                                           | 24                                        | 93               | LA                                  | 24%                                           | 23                                        | 95               |
| 20         | AK    | 25%                                           | 9                                         | 36               | MN                                  | 24%                                           | 19                                        | 80               |
| 21         | HI    | 25%                                           | 3                                         | 12               | UT                                  | 23%                                           | 9                                         | 40               |
| 22         | NY    | 24%                                           | 13                                        | 54               | AL                                  | 22%                                           | 6                                         | 27               |
| 23         | VA    | 22%                                           | 17                                        | 78               | MA                                  | 22%                                           | 28                                        | 129              |
| 24         | FL    | 22%                                           | 20                                        | 92               | OR                                  | 21%                                           | 10                                        | 47               |
| 25         | MD    | 21%                                           | 8                                         | 38               | NY                                  | 21%                                           | 98                                        | 464              |
| 26         | SC    | 21%                                           | 12                                        | 57               | SC                                  | 20%                                           | 3                                         | 15               |
| 27         | NM    | 21%                                           | 5                                         | 24               | NC                                  | 18%                                           | 16                                        | 90               |
| 28         | ME    | 20%                                           | 5                                         | 25               | CA                                  | 17%                                           | 70                                        | 416              |
| 29         | WA    | 20%                                           | 21                                        | 105              | ID                                  | 17%                                           | 20                                        | 120              |
| 30         | CA    | 20%                                           | 18                                        | 91               | TX                                  | 17%                                           | 12                                        | 72               |
| 31         | MA    | 18%                                           | 6                                         | 33               | GA                                  | 16%                                           | 18                                        | 110              |
| 32         | PA    | 17%                                           | 10                                        | 59               | WI                                  | 16%                                           | 51                                        | 315              |
| 33         | GA    | 17%                                           | 6                                         | 36               | MI                                  | 16%                                           | 24                                        | 149              |
| 34         | IA    | 15%                                           | 9                                         | 59               | OH                                  | 16%                                           | 35                                        | 217              |
| 35         | NE    | 14%                                           | 3                                         | 21               | FL                                  | 16%                                           | 28                                        | 175              |
| 36         | KS    | 14%                                           | 9                                         | 64               | IL                                  | 15%                                           | 17                                        | 111              |
| 37         | WY    | 13%                                           | 3                                         | 24               | MI                                  | 15%                                           | 4                                         | 27               |
| 38         | MS    | 12%                                           | 10                                        | 81               | MD                                  | 14%                                           | 21                                        | 150              |

|        |       |     |     |     |       |     |     |      |
|--------|-------|-----|-----|-----|-------|-----|-----|------|
| 39     | NC    | 12% | 2   | 17  | AK    | 14% | 11  | 79   |
| 40     | ID    | 11% | 3   | 28  | IA    | 12% | 5   | 41   |
| 41     | AL    | 11% | 7   | 66  | MA    | 12% | 11  | 94   |
| 42     | NJ    | 10% | 4   | 39  | WA    | 12% | 12  | 103  |
| 43     | WI    | 10% | 2   | 20  | NJ    | 11% | 13  | 114  |
| 44     | KY    | 10% | 10  | 102 | MT    | 10% | 2   | 20   |
| 45     | MT    | 9%  | 3   | 32  | WV    | 7%  | 2   | 28   |
| 46     | MN    | 9%  | 5   | 54  | KY    | 7%  | 2   | 29   |
| 47     | WV    | 6%  | 3   | 50  | NV    | 7%  | 1   | 15   |
| 48     | TN    | 6%  | 5   | 87  | PA    | 7%  | 16  | 246  |
| 49     | AR    | 3%  | 2   | 59  | VA    | 6%  | 5   | 79   |
| 50     | DE    | 0%  | 0   | 6   | KS    | 0%  | 0   | 15   |
| 51     | ND    | 0%  | 0   | 7   | WY    | 0%  | 0   | 10   |
| Region |       |     |     |     |       |     |     |      |
|        | MW    | 26% | 196 | 770 | MW    | 20% | 221 | 1111 |
|        | NE    | 23% | 66  | 289 | NE    | 17% | 205 | 1183 |
|        | South | 20% | 193 | 956 | South | 17% | 198 | 1136 |
|        | West  | 25% | 133 | 531 | West  | 21% | 214 | 1041 |

Online appendix: Proportion of CMHCs and OMHFs that offered integrated primary care and other wellness services

| Type of service                            | Proportion of CMHCs that offered service |                   |                   | Proportion of OMHFs that offered service |                   |                   |
|--------------------------------------------|------------------------------------------|-------------------|-------------------|------------------------------------------|-------------------|-------------------|
|                                            | 2016                                     | 2015 <sup>a</sup> | 2014 <sup>a</sup> | 2016                                     | 2015 <sup>a</sup> | 2014 <sup>a</sup> |
| Survey year                                | 2016                                     | 2015 <sup>a</sup> | 2014 <sup>a</sup> | 2016                                     | 2015 <sup>a</sup> | 2014 <sup>a</sup> |
| Integrated primary care                    | 23.1                                     | 19.4              | 19.5              | 18.7                                     | 16.8              | 17.0              |
| Screening for tobacco use                  | 48.0                                     | 40.6              | 45.8              | 42.3                                     | 35.5              | 39.4              |
| Smoking/tobacco cessation counseling       | 33.9                                     | 27.7              | 27.9              | 29.6                                     | 25.6              | 26.8              |
| Nicotine replacement therapy               | 15.2                                     | 11.9              | 11.3              | 12.5                                     | 10.3              | 11.2              |
| Non-nicotine tobacco cessation medications | 14.9                                     | 11.4              | 15.9              | 13.7                                     | 10.6              | 14.7              |
| Diet and exercise counseling               | 23.1                                     | 19.7              | 25.2              | 19.5                                     | 17.0              | 22.8              |
| Chronic disease/illness management         | 19.3                                     | 17.6              | 18.4              | 15.5                                     | 13.4              | 14.4              |

|                            |      |      |      |      |      |      |
|----------------------------|------|------|------|------|------|------|
| Total number of facilities | 2546 | 2806 | 3155 | 4471 | 5071 | 4534 |
|----------------------------|------|------|------|------|------|------|

a. Findings for 2015 and 2014 are from the publicly available N-MHSS reports listed in the references.
